# Supplementary material for: Catalytic mechanism of cytochrome P450 for N-methylhydroxylation of nicotine: reaction pathways and regioselectivity of the enzymatic nicotine oxidation
Source: Royal Society of Chemistry journal article supplement (doi:10.1039/c2dt32106h), 2013-01-01
Supplement: c2dt32106h.pdf [file c2dt32106h.pdf]

## Supporting Information for

# Catalytic Mechanism of Cytochrome P450 for N-methylhydroxylation of Nicotine: Reaction Pathways and Regioselectivity of the Enzymatic Nicotine Oxidation

Dongmei Li,<sup>\*a,b</sup> Xiaoqin Huang,<sup>b</sup> Jianping Lin<sup>a</sup> and Chang-Guo Zhan<sup>\*b</sup>

<sup>a</sup> College of Pharmacy, State Key Laboratory of Medicinal Chemical Biology and Tianjin Key Laboratory of Molecular Drug Research, Nankai University, Tianjin 300071, China; Fax: +86-22-23507760; Tel: +86-22-23506290; E-mail: dongmeili@nankai.edu.cn

<sup>b</sup> Department of Pharmaceutical Sciences, College of Pharmacy, University of Kentucky, 789 South Limestone Street, Lexington, Kentucky 40536, USA; Tel: 859-323-3943; E-mail: zhan@uky.edu

### Table of Contents:

1. **Table S1.** Relative free energies (in kcal/mol) calculated at QM/MM(B1:AMBER), QM/MM(B2:AMBER) and QM/MM-FEP(B2:AMBER) levels including zero-point and thermal corrections for the QM subsystem.
2. **Table S2.** Imaginary vibrational frequencies calculated for the transition states.

**Table S1.** Relative free energies (in kcal/mol) calculated at the QM/MM(B1:AMBER), QM/MM(B2:AMBER) and QM/MM-FEP(B2:AMBER) levels including zero-point and thermal corrections for the QM subsystem.

|                                | QM/MM<br>(B1:AMBER)+ZPE | QM/MM<br>(B2:AMBER)+ZPE | QM/MM-FEP<br>(B2:AMBER) +<br>ZPE |
|--------------------------------|-------------------------|-------------------------|----------------------------------|
| CYP2A6-SR <sub>t</sub> complex |                         |                         |                                  |
| <sup>4</sup> RC                | 0.0                     | 0.0                     | 0.0                              |
| <sup>4</sup> TS <sub>H</sub>   | 18.8                    | 17.9                    | 18.0                             |
| <sup>4</sup> IM                | 1.6                     | -2.4                    | -1.8                             |
| <sup>4</sup> TS <sub>reb</sub> | 1.9                     | -2.9                    | -2.3                             |
| <sup>4</sup> PC                | -42.7                   | -45.7                   | -45.3                            |
| <sup>2</sup> RC                | 0.0                     | 0.0                     | 0.0                              |
| <sup>2</sup> TS <sub>H</sub>   | 16.8                    | 16.2                    | 15.5                             |
| <sup>2</sup> IM                | 3.4                     | 1.3                     | 0.7                              |
| <sup>2</sup> TS <sub>reb</sub> | 3.4                     | 1.1                     | -0.2                             |
| <sup>2</sup> PC                | -37.0                   | -41.5                   | -41.6                            |
| CYP2A6-SR <sub>c</sub> complex |                         |                         |                                  |
| <sup>4</sup> RC                | 0.0                     | 0.0                     | 0.0                              |
| <sup>4</sup> TS <sub>H</sub>   | 21.2                    | 20.9                    | 19.4                             |
| <sup>4</sup> PC                | -45.2                   | -49.1                   | -46.0                            |
| <sup>2</sup> RC                | 0.0                     | 0.0                     | 0.0                              |
| <sup>2</sup> TS <sub>H</sub>   | 19.6                    | 19.5                    | 18.0                             |
| <sup>2</sup> PC                | -38.4                   | -43.3                   | -42.6                            |

**Table S2.** Imaginary vibrational frequencies calculated for the transition states

| CYP2A6-SR <sub>t</sub> complex |               | CYP2A6-SR <sub>c</sub> complex |               |
|--------------------------------|---------------|--------------------------------|---------------|
| <sup>4</sup> TS <sub>H</sub>   | <i>i</i> 1638 | <sup>4</sup> TS <sub>reb</sub> | <i>i</i> 85   |
| <sup>2</sup> TS <sub>H</sub>   | <i>i</i> 1199 | <sup>2</sup> TS <sub>reb</sub> | <i>i</i> 79   |
|                                |               | <sup>4</sup> TS <sub>H</sub>   | <i>i</i> 1738 |
|                                |               | <sup>2</sup> TS <sub>H</sub>   | <i>i</i> 1091 |
